# Supplementary material for: Infections following bispecific antibodies in myeloma: a systematic review and meta-analysis
Source: PubMed Central journal article supplement — Blood Adv. 2023 Jul 25;7(19):5898–903. doi: 10.1182/bloodadvances.2023010539 (PMC10558589; doi:10.1182/bloodadvances.2023010539), 2023-07-25
Supplement: BLOODA_ADV-2023-010539-mmc1.pdf [file BLOODA_ADV-2023-010539-mmc1.pdf]

|    |                                                                                                           |          |
|----|-----------------------------------------------------------------------------------------------------------|----------|
| 1  | <b>Supplementary Contents</b>                                                                             |          |
| 2  | <b>Supplementary Figure S1: Key Search Strategy</b> .....                                                 | <b>2</b> |
| 3  | <b>Supplementary Table S1: Extracted variables</b> .....                                                  | <b>3</b> |
| 4  | <b>Supplementary Figure S2: PRIMSA Flow-Chart of Extracted Articles</b> .....                             | <b>4</b> |
| 5  | <b>Supplementary Table S2: Complications of treatment according to bispecific target</b> .....            | <b>5</b> |
| 6  | <b>Supplementary Table S3a and S3b: S3a: Fatal infections recorded in clinical trials, S3b: Causative</b> |          |
| 7  | <b>pathogens by microbiological classification</b> .....                                                  | <b>6</b> |
| 8  | <b>Supplementary Table S4: Infection outcomes reported by observational studies of bispecific treated</b> |          |
| 9  | <b>patients</b> .....                                                                                     | <b>7</b> |
| 10 | <b>Supplementary Table S5: Joanna Brigg’s Institute Criteria assessment for study bias</b> .....          | <b>8</b> |
| 11 |                                                                                                           |          |
| 12 |                                                                                                           |          |
| 13 |                                                                                                           |          |
| 14 |                                                                                                           |          |
| 15 |                                                                                                           |          |
| 16 |                                                                                                           |          |
| 17 |                                                                                                           |          |
| 18 |                                                                                                           |          |
| 19 |                                                                                                           |          |
| 20 |                                                                                                           |          |
| 21 |                                                                                                           |          |
| 22 |                                                                                                           |          |
| 23 |                                                                                                           |          |
| 24 |                                                                                                           |          |
| 25 |                                                                                                           |          |
| 26 |                                                                                                           |          |
| 27 |                                                                                                           |          |
| 28 |                                                                                                           |          |
| 29 |                                                                                                           |          |
| 30 |                                                                                                           |          |
| 31 |                                                                                                           |          |
| 32 |                                                                                                           |          |
| 33 |                                                                                                           |          |

34 Supplementary Figure S1: Detailed Search Strategy

1. exp antibody, bispecific/ and exp immunotherapy/ and exp myeloma, adoptive/

(bispecific\* or BITE\* or trispecific\*).mp. [mp=title, abstract, heading word, drug

2. trade name, original title, device manufacturer, drug manufacturer, device trade name, keyword heading word, floating subheading word, candidate term word]

(teclistamab or abbv-383 or elranatamab or linvoseltamab or REGN5458 or pavurutamab or AMG701 or talquetamab or cevostamab or RG6234 or

3. BFCR4350A).mp. [mp=title, abstract, heading word, drug trade name, original title, device manufacturer, drug manufacturer, device trade name, keyword heading word, floating subheading word, candidate term word]

35 4. 2 and (1 or 3)

36 Detailed Search Strategy

37 Studies were identified via the OVID platform of PUBMED, MEDLINE, EMBASE and  
38 Cochrane to identify relevant articles, translatable to English, between inception and  
39 February 10, 2023 using the following terms; antibody, bispecific, immunotherapy, myeloma,  
40 adaptive, teclistamab, abbv-383, elranatamab, linvoseltamab, REGN5458, pavurutamab,  
41 AMG701, talquetamab, cevostamab, RG6234, BFCR4350A. The comprehensive search  
42 strategy is included below. Manual searches of article reference lists were performed.  
43 Manual searches of recent international conference presentations for additional data  
44 (American Society of Haematology; 2020, 2021, 2022 and American Society of Clinical  
45 Oncology; 2020, 2021, 2022) were performed.

46

47

48

49

50

51

52

53

54

55

56

57

58

59

60

61

62  
63  
64  
65  
66  
67  
68  
69  
70  
71  
72  
73  
74  
75  
76  
77  
78  
79  
80  
81  
82  
83

Supplementary Table S1 - Extracted Variables

|                         |                                                                                                                                                                                                                                                                                                                                                    |
|-------------------------|----------------------------------------------------------------------------------------------------------------------------------------------------------------------------------------------------------------------------------------------------------------------------------------------------------------------------------------------------|
| Patient information     | <ul style="list-style-type: none"><li>• Median age</li><li>• Triple- refractory disease</li><li>• Penta- refractory disease</li><li>• Prior transplant</li></ul>                                                                                                                                                                                   |
| Treatment complications | <ul style="list-style-type: none"><li>• Cytokine release syndrome (all grade, Grade <math>\geq</math> 3)</li><li>• ICANS (all grade, Grade <math>\geq</math> 3)</li><li>• Neutropenia (all grade, Grade <math>\geq</math> 3)</li><li>• Hypogammaglobulinaemia (all grade, Grade <math>\geq</math> 3)</li></ul>                                     |
| Infection Outcomes      | <ul style="list-style-type: none"><li>• All-grade infections</li><li>• Grade <math>\geq</math> 3 infections</li><li>• Grade <math>\geq</math> 5 infections</li><li>• Microbiologically confirmed infections<ul style="list-style-type: none"><li>○ Bacterial infections</li><li>○ Viral infections</li><li>○ Fungal infections</li></ul></li></ul> |

84 Supplementary Figure S2 – PRISMA flow-chart of extracted document

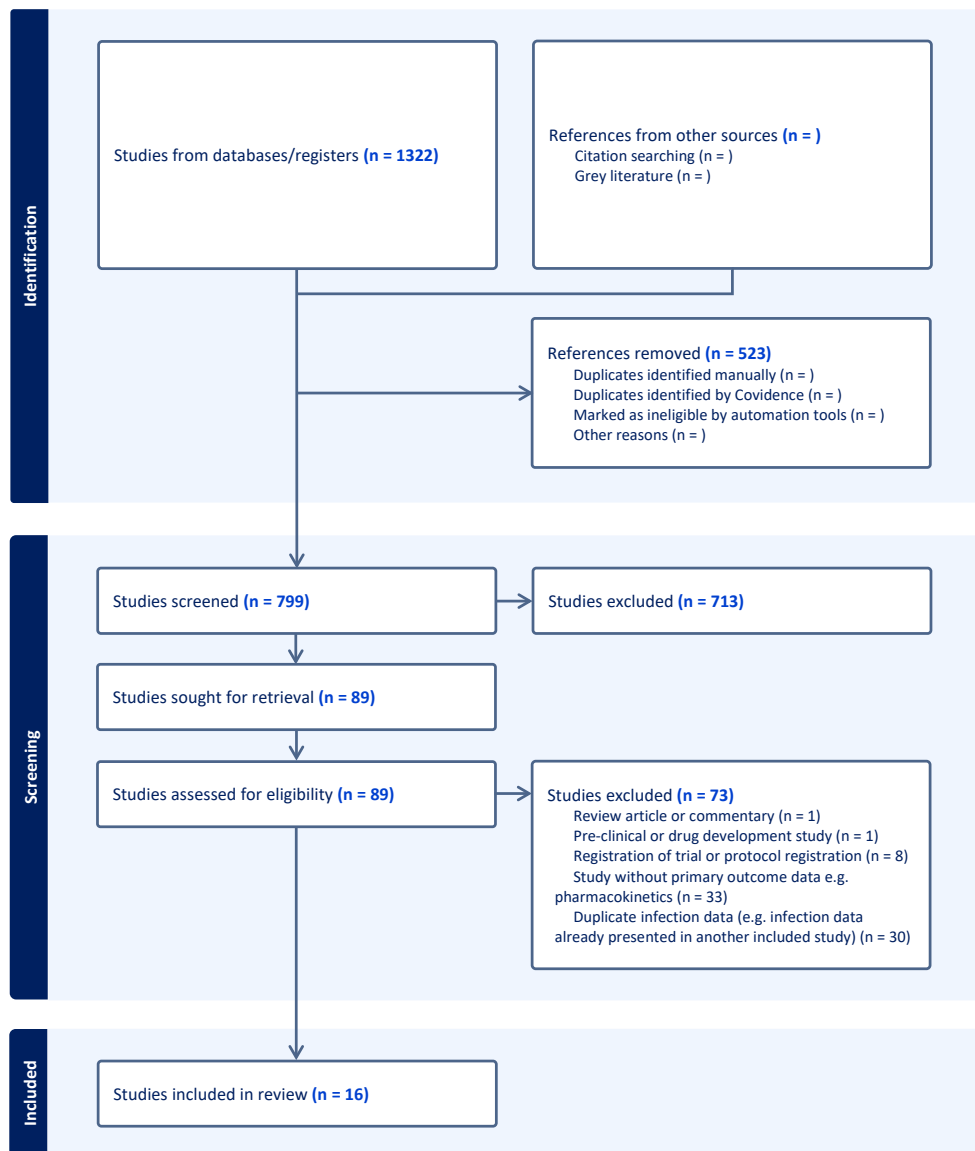

27th March 2023

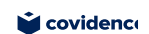

85

86

87

88

89 Supplementary Table S2 – Complications of treatment according to bispecific target

|                      | BCMA-bispecific (% , 95CI) | Non-BCMA-bispecific |
|----------------------|----------------------------|---------------------|
| Grade ≥3 Neutropenia | 44 (29 – 59)               | 55 (42 – 68)        |
| Grade ≥3 CRS         | 1 (0 – 1)                  | 2 (1 – 3)           |
| All-grade ICANS      | 6 (2 – 10)                 | 19 (2 – 37)         |
| Received Steroids    | 12 (7 – 18)                | 21 (5 – 38)         |

90  
91  
92  
93  
94  
95  
96  
97  
98  
99  
100  
101  
102  
103  
104  
105  
106  
107  
108  
109  
110  
111  
112  
113  
114  
115  
116

117 Supplementary Table S3 – S3a: Fatal infections recorded in clinical trials, S3b: Causative  
 118 pathogens by microbiological classification.

| S3a                          | Target            | Grade 5 Infections | Bacterial pathogen | Fungal Pathogen | Viral Pathogen |
|------------------------------|-------------------|--------------------|--------------------|-----------------|----------------|
| Wong et al., 2022            | BCMA              | 0                  | 0                  | 0               | 0              |
| D'Souza et al., 2022         | BCMA              | 8                  | 1                  | 0               | 7              |
| Topp et al., 2020            | BCMA              | 2                  | NR                 | NR              | NR             |
| Harrison et al., 2020        | BCMA              | 2                  | 2                  | 0               | 0              |
| Raje et al., 2022            | BCMA              | 1                  | NR                 | NR              | NR             |
| Bumma et al., 2022           | BCMA              | 10                 | NR                 | NR              | NR             |
| Bahlis et al., 2022          | BCMA              | 6                  | --                 | --              | 2              |
| Moreau et al., 2022          | BCMA              | 15                 | 2                  | 0               | 13             |
| Abdallah et al., 2022        | BCMA + albumin    | NR                 | NR                 | NR              | NR             |
| Grosicki et al., 2022        | BCMA +CD38        | 8                  | NR                 | NR              | NR             |
| Rodriguez-Otero et al., 2022 | BCMA +CD38        | 1                  | 1                  | 0               | 0              |
| Searle et al., 2022          | BCMA +CD38 + IMiD | 1                  | 0                  | 0               | 1              |
| Trudel et al., 2021          | FcRH5             | 0                  | 0                  | 0               | 0              |
| Carlos-Stella et al., 2022   | GPR5CD            | 2                  | NR                 | NR              | NR             |
| Chari et al., 2022           | GPR5CD            | 2                  | 1                  | --              | --             |
| van de Donk et al., 2022     | GPR5CD + CD38     | 0                  | 0                  | 0               | 0              |

119

| S3b                                     | Bacterial pathogen                                                                                                | Fungal Pathogen | Viral Pathogen                                                        |
|-----------------------------------------|-------------------------------------------------------------------------------------------------------------------|-----------------|-----------------------------------------------------------------------|
| Causative pathogen of a fatal infection | Sepsis NOS (N = 3)<br><i>Strep pneumoniae</i> (N = 1)<br><i>Pseudomonas</i> (N = 2)<br>Bacterial pneumonia (N =1) |                 | COVID-19 (N = 21)<br>PML (N = 1)<br>CMV (N =1)<br>Adenovirus FHF(N=1) |

120 NOS = not otherwise specified, PML = progressive multifocal leukoencephalopathy, FHF = fulminant hepatic failure

121 Supplementary Table S4 – Infection outcomes reported by observational studies of bispecific  
 122 treated patients.

| Author / Year                                             | Mohan et al., 2022 <sup>25</sup> | Sim et al., 2022 <sup>26,27</sup> | Lancman et al., 2022 <sup>28</sup> | Hoeynck et al., 2022 <sup>29</sup> |
|-----------------------------------------------------------|----------------------------------|-----------------------------------|------------------------------------|------------------------------------|
| Study Design                                              | Observational                    | Observational                     | Observational                      | Observational                      |
| Product                                                   | NR                               | NR                                | NR                                 | NR                                 |
| Target                                                    | BCMA                             | NR                                | BCMA                               | BCMA                               |
| Participants (N)                                          | 36                               | 39                                | 37                                 | 29                                 |
| Median age (years)                                        | 66.5                             | 62                                | 66                                 | 64                                 |
| Prior therapy (median)                                    | 6                                | 6                                 | 7                                  | 6                                  |
| Penta-class refractory                                    | NR                               | NR                                | NR                                 | 45%                                |
| Median follow-up                                          | 8.5 months                       | 5.1 months                        | 424 months <sup>1</sup>            | 10.3 months                        |
| Grade ≥ 3 CRS                                             | 0%                               | NR <sup>2</sup>                   | NR                                 | NR                                 |
| Grade ≥ 3 ICANS                                           | 0%                               | NR <sup>3</sup>                   | NR                                 | NR                                 |
| Steroid exposure                                          | 0%                               | NR                                | NR                                 | NR                                 |
| Tocilizumab exposure                                      | 28.6%                            | NR                                | NR                                 | NR                                 |
| Grade ≥ 3 neutropenia                                     | NR                               |                                   | NR                                 | NR                                 |
| Hypogammaglobulinaemia                                    | 80% <sup>4</sup>                 | 87%                               | 100% <sup>5</sup>                  | 59% <sup>6</sup>                   |
| Median time to infection onset                            | 49 days                          | 79 days <sup>7</sup>              | 114 days <sup>8</sup>              | 278 days <sup>9</sup>              |
| Infection incidence for observation period (all-patients) | 0.69 events / patients           | 2.8 events / patient              | 3.3 events / patient-year          | 1.4 events / patient               |
| Patients with All Grade Infections                        | 41%                              | 90%                               | 100%                               | 36%                                |
| Patients with Grade ≥ 3 infection                         | 38%                              | 41%                               | 38%                                | NR                                 |
| Patients with Grade 5 infections                          | 6%                               | 8%                                | 5%                                 | NR                                 |
| Infection events requiring hospitalisation                | 60%                              | 57%                               | NR                                 | NR                                 |
| Average hospital LOS                                      | 4.8 days                         | 4 days                            | NR                                 | NR                                 |
| Infection events requiring ICU admission                  | NR                               | 4%                                | NR                                 | NR                                 |
| Total Infection Events                                    | 25                               | 111                               | 118                                | 39                                 |
| Microbiologically confirmed infection                     | 23                               | 33                                | 118                                | 25                                 |
| Bacterial infections                                      | 13                               | 15                                | 51                                 | 12                                 |
| Gram negative bacteria                                    | 6                                | 12                                | NR                                 | NR                                 |
| Gram positive bacteria                                    | 4                                | 3                                 | NR                                 | NR                                 |
| Viral infections                                          | 10                               | 22                                | 54                                 | 13                                 |
| Respiratory virus (e.g. COVID-19, adenovirus, rhinovirus) | NR                               | 68%                               | NR                                 | NR                                 |
| Viral reactivation (e.g. CMV, HSV, BK virus)              | NR                               | 32%                               | 22% <sup>10</sup>                  | NR                                 |
| Fungal infections                                         | NR                               | 0                                 | 13 <sup>11</sup>                   | 0                                  |

123 NR = not reported

<sup>1</sup> Cumulative treatment months

<sup>2</sup> 72% all-grade CRS

<sup>3</sup> 5% all-grade ICANS

<sup>4</sup> With baseline hypogammaglobulinaemia; no post-treatment data reported

<sup>5</sup> Of the 70% of patients with disease response

<sup>6</sup> Received IVIG supplementation

<sup>7</sup> Microbiologically confirmed infections

<sup>8</sup> Grade 3 – 5 infections

<sup>9</sup> Grade 3 – 5 infections

<sup>10</sup> CMV reactivation rate in cohort 22%

<sup>11</sup> No further breakdown of fungal pathogen provided

124 Supplementary Table S5 – Joanna Brigg’s Institute assessment of study bias.

|                              | Criteria 1:<br>Reflective<br>sample | Criteria 2:<br>Appropriate<br>recruitment | Criteria 3:<br>Detailed<br>setting | Criteria 4:<br>Sufficient<br>coverage | Criteria 5:<br>Definition of<br>infection | Criteria 6:<br>Measurement<br>of infection | Criteria 7:<br>Statistical<br>analysis | Criteria 8:<br>Follow-up |
|------------------------------|-------------------------------------|-------------------------------------------|------------------------------------|---------------------------------------|-------------------------------------------|--------------------------------------------|----------------------------------------|--------------------------|
| Wong et al., 2022            | Yes                                 | Yes                                       | Yes                                | Yes                                   | Yes                                       | Yes                                        | Yes                                    | Yes                      |
| D'Souza et al., 2022         | Yes                                 | Yes                                       | Yes                                | Yes                                   | Yes                                       | Yes                                        | Yes                                    | Yes                      |
| Topp et al., 2020            | Yes                                 | Yes                                       | Yes                                | Yes                                   | Yes                                       | Yes                                        | Yes                                    | Yes                      |
| Harrison et al., 2020        | Yes                                 | Yes                                       | Yes                                | Yes                                   | Yes                                       | Yes                                        | Yes                                    | Yes                      |
| Trudel et al., 2021          | Yes                                 | Yes                                       | Yes                                | Yes                                   | Yes                                       | Yes                                        | Yes                                    | Yes                      |
| Raje 2022                    | Yes                                 | Yes                                       | No                                 | Yes                                   | Yes                                       | Yes                                        | Yes                                    | Yes                      |
| Bahlis 2022                  | Yes                                 | Yes                                       | Yes                                | Yes                                   | Yes                                       | Yes                                        | Yes                                    | Yes                      |
| Grosicki 2022                | Yes                                 | Yes                                       | No                                 | Yes                                   | Yes                                       | No                                         | Yes                                    | Yes                      |
| Bumma et al., 2022           | Yes                                 | Yes                                       | Yes                                | Yes                                   | Yes                                       | Yes                                        | Yes                                    | Yes                      |
| Carlos-Stella et al., 2022   | Yes                                 | Yes                                       | Yes                                | Yes                                   | Yes                                       | Yes                                        | Yes                                    | Yes                      |
| Chari et al., 2022           | Yes                                 | Yes                                       | Yes                                | Yes                                   | Yes                                       | Yes                                        | Yes                                    | Yes                      |
| van de Donk et al., 2022     | Yes                                 | Yes                                       | Yes                                | Yes                                   | Yes                                       | Yes                                        | Yes                                    | Yes                      |
| Moreau et al., 2022          | Yes                                 | Yes                                       | Yes                                | Yes                                   | Yes                                       | Yes                                        | Yes                                    | Yes                      |
| Rodriguez-Otero et al., 2022 | Yes                                 | Yes                                       | Yes                                | Yes                                   | Yes                                       | Yes                                        | Yes                                    | Yes                      |
| Searle et al 2022            | Yes                                 | Yes                                       | Yes                                | Yes                                   | Yes                                       | Yes                                        | Yes                                    | Yes                      |
| Abdallah et al., 2022        | Yes                                 | Yes                                       | Yes                                | Yes                                   | Yes                                       | Yes                                        | Yes                                    | Yes                      |
| Mohan et al., 2022           | Yes                                 | Yes                                       | Yes                                | Yes                                   | Yes                                       | Yes                                        | Yes                                    | Yes                      |
| Sim et al., 2022             | Yes                                 | Yes                                       | Yes                                | Yes                                   | Yes                                       | Yes                                        | Yes                                    | Yes                      |
| Lancman et al., 2022         | Yes                                 | Yes                                       | No                                 | Yes                                   | Yes                                       | Yes                                        | Yes                                    | Yes                      |
| Hoeynck et al., 2022         | Yes                                 | Yes                                       | No                                 | Yes                                   | Yes                                       | No                                         | Yes                                    | Yes                      |

125

126

127
